# Supplementary material for: HvALMT1 from barley is involved in the transport of organic anions
Source: PubMed Central journal article supplement — J Exp Bot. 2010 Feb 22;61(5):1455–67. doi: 10.1093/jxb/erq023 (PMC2837267; doi:10.1093/jxb/erq023), 2010-02-22
Supplement: erq023_1.pdf [file erq023_1.pdf]

# **HvALMT1 from barley is involved in the transport of organic anions**

*Benjamin D Gruber, Peter R Ryan, Alan E Richardson, Stephen D Tyerman, Sunita Ramesh, Diane M Hebb, Susan M Howitt, and Emmanuel Delhaize*

Supplementary Material

| <b>Name</b>     | <b>Sequence (5'-3')</b>                                                                    | <b>Description</b>                                                                 |
|-----------------|--------------------------------------------------------------------------------------------|------------------------------------------------------------------------------------|
| <b>M13F</b>     | GTAAAACGACGGCCAGT                                                                          |                                                                                    |
| <b>M13R</b>     | AACAGCTATGACCATG                                                                           |                                                                                    |
| <b>Hv1-1</b>    | GGGTGGCGCACTCGCTC                                                                          |                                                                                    |
| <b>Hv1-2</b>    | GCTCGACACGGCCACCAG                                                                         |                                                                                    |
| <b>Hv1-3</b>    | ATGGAGGTTGATCACCGCATC                                                                      |                                                                                    |
| <b>Hv1-4</b>    | TCAACTCGCAATGTTGATAGCG                                                                     |                                                                                    |
| <b>Hv1-5</b>    | CGACGTTCTCGCGCTTCAT                                                                        |                                                                                    |
| <b>Hv1-6</b>    | GACGACGACGACGGTGAGCACG                                                                     |                                                                                    |
| <b>Hv1-7</b>    | CACCCATGGAGCCAATACCAG                                                                      |                                                                                    |
| <b>Hv1-8</b>    | GCACTGACGACAAAGAGCTCC                                                                      |                                                                                    |
| <b>Hv1-9</b>    | GGAATGAATTATCAGAGGACGCAG                                                                   |                                                                                    |
| <b>Hv1GFP-1</b> | GCCACTTCAAGAACCCTGAAAAAAGCTCAGAAAGATGTC<br>GCTATCAACATTGCGAGT <u>ATGGTGAGCAAGGGCCACG</u>   | <i>GFP</i><br>complementary<br>sequence underlined                                 |
| <b>Hv1GFP-2</b> | AGCGTGACATAACTAATTACATGATGCGGCCCTCTAGAT<br>GCATGCTCGAGCCCGGGT <u>TACTTGTACAGCTCGTCCATG</u> | <i>SmaI</i> site italicised,<br><i>GFP</i><br>complementary<br>sequence underlined |
| <b>Hv1GFP-3</b> | <u>CTCACTAGATTAATTA</u> AAAAGCTTTGAGATTGGCATCG                                             | Forward primer,<br><i>PacI</i> site italicised,<br>overhang underlined             |
| <b>Hv1GFP-4</b> | <u>GATCCAGTGGGCGCGCCGGCAGAAATCAGAATGGTGG</u>                                               | Reverse primer,<br><i>AscI</i> site italicised,<br>overhang underlined             |
| <b>Hv1GFP-5</b> | TGCCAACTCACACATACACACACC                                                                   | Forward promoter<br>sequencing primer                                              |
| <b>Hv1GFP-6</b> | TTTCCTAGCGTACTTGGGAAGC                                                                     | Forward promoter<br>sequencing primer                                              |
| <b>Hv1GFP-7</b> | TTACGTATGATCCATGATCTTCC                                                                    | Reverse promoter<br>sequencing primer                                              |
| <b>Hv1GFP-8</b> | CTGTTGGCTGGCTGGTGGCA                                                                       | Plasmid-localised<br>sequencing primer                                             |
| <b>Hv1MAP-1</b> | AGGATCGCGAGGGAGGACCTT                                                                      |                                                                                    |
| <b>Hv1MAP-2</b> | ATCCGTTTCTAAATATAAGTCTCTTTAA                                                               |                                                                                    |
| <b>Hv1MAP-3</b> | AGGATCGCGAGGGAGGCCA                                                                        |                                                                                    |

|                 |                               |                                                                                                                                                |
|-----------------|-------------------------------|------------------------------------------------------------------------------------------------------------------------------------------------|
| <b>Hv1MAP-4</b> | ATCCGTTTCTAAATATAAGTCTCTTTAG  |                                                                                                                                                |
| <b>Hv2-1</b>    | GCTCCGTCAGCGCAATGA            |                                                                                                                                                |
| <b>Hv2-2</b>    | TCACTTTGGTTTCAGTTTCTG         |                                                                                                                                                |
| <b>Hv2-3</b>    | TCTCGGTGTTCTACTACAC           |                                                                                                                                                |
| <b>Hv2-4</b>    | ACTTGTACCCCTCCGCCGC           |                                                                                                                                                |
| <b>Hv2-5</b>    | TTCGCGGACCAGGCGGACG           |                                                                                                                                                |
| <b>Hv2-6</b>    | CGGTGTTTCATGTCGGCCACG         |                                                                                                                                                |
| <b>qRTPCR-1</b> | <u>TTCCTAGCGTCCGGCGGCGACG</u> | Forward primer for detection of <i>HvALMT1</i> ; single underlined text hybridises with exon 2, double underlined text hybridises with exon 3. |
| <b>qRTPCR-2</b> | ATGAGCTCCTCCACGCGGTAGC        | Reverse primer for detection of <i>HvALMT1</i>                                                                                                 |
| <b>qRTPCR-3</b> | GTGAGGCTGGTGCTGATTACG         | Forward primer for detection of <i>HvGAPDH</i> ; Burton <i>et al.</i> , (2004).                                                                |
| <b>qRTPCR-4</b> | TGGTGCAGCTAGCATTTGAGAC        | Reverse primer for detection of <i>HvGAPDH</i> ; Burton <i>et al.</i> , (2004).                                                                |
| <b>TaALMT1F</b> | GGAATGGAATTCAACTGCTTTGGCG     | Forward primer for detection of <i>TaALMT1</i>                                                                                                 |
| <b>TaALMT1R</b> | TCCTCAGTGGCCTTCGAATTAAGG      | Reverse primer for detection of <i>TaALMT1</i>                                                                                                 |

**Supplementary Table 1. Primers used for PCR.**

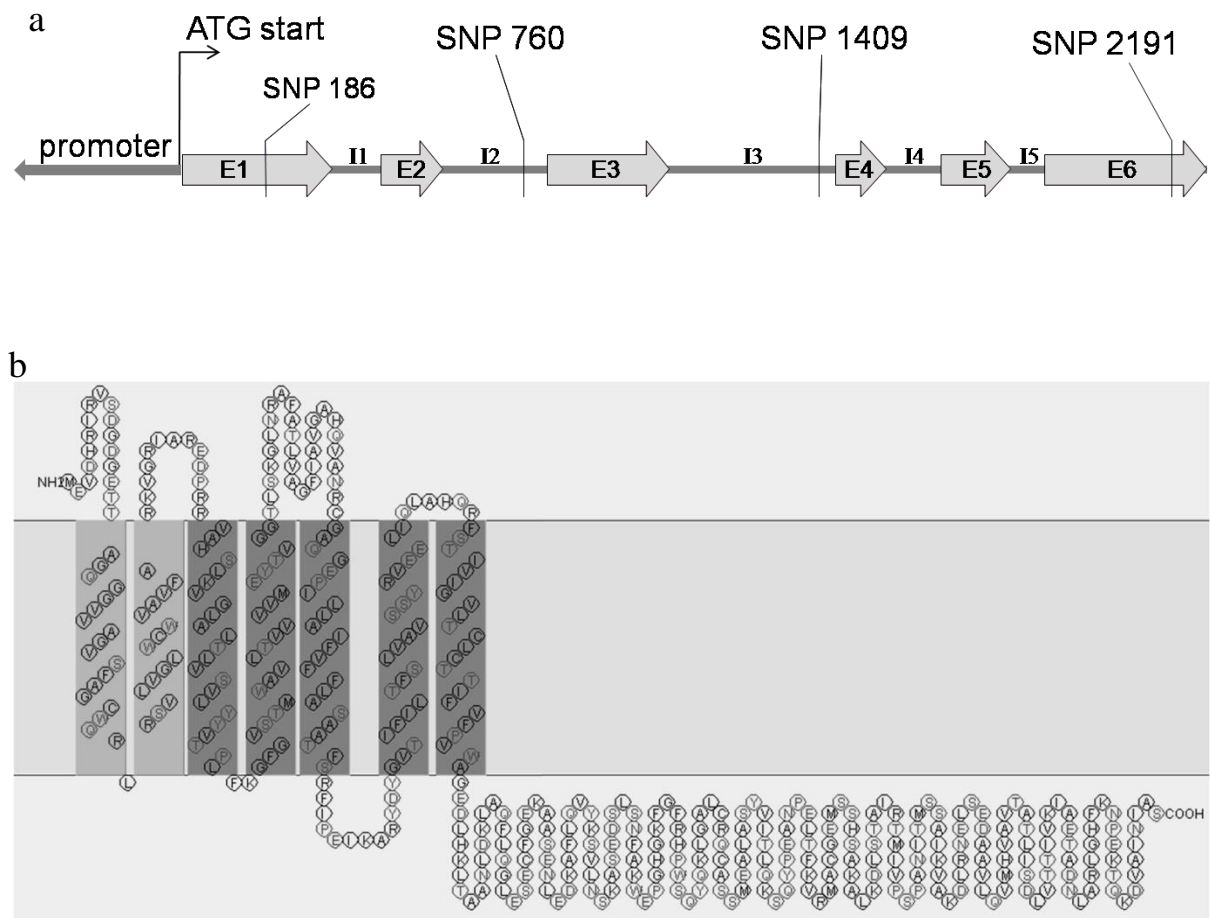

**Supplementary Figure 1.** The genomic structure and hydropathy plot of *HvALMT1*.

The genomic structure of *HvALMT1* is shown in panel a indicating the position of the ATG start site, exons one to six (E1 to E6) and introns one to five (I1 to I5). The position of the single nucleotide polymorphisms (SNP's) are indicated along with the nucleotide position from the ATG start site. The promoter region is indicated upstream of the ATG start site. The transmembrane topology of the *HvALMT1* protein as predicted by SOSUI v.1.11 is indicated in panel b.

|                |                      |                      |                       |                       |
|----------------|----------------------|----------------------|-----------------------|-----------------------|
| Dayton         | <sup>184</sup> CCTCG | <sup>758</sup> CTTTA | <sup>1407</sup> GAGTT | <sup>2189</sup> CTGCT |
| Morex          | CCACG                | CTCTA                | GAGTT                 | CTACT                 |
| Golden Promise | CCACG                | CTCTA                | GAATT                 | CTGCT                 |
| Zhepi 2        | CCACG                | CTCTA                | GAATT                 | CTGCT                 |

**Supplementary Figure 2.** Single nucleotide polymorphisms (SNPs) in *HvALMT1* between four barley cultivars.

Partial nucleotide sequences detailing the SNPs (in bold) are shown for each of the four cultivars. The last SNP results in a change of amino acid at position 431 from an alanine in cultivars Dayton, Golden Promise and Zhepi 2 to a threonine in cultivar Morex. The numbers indicate the base number of the first nucleotide shown in each set counted from the ATG start site of *HvALMT1*.

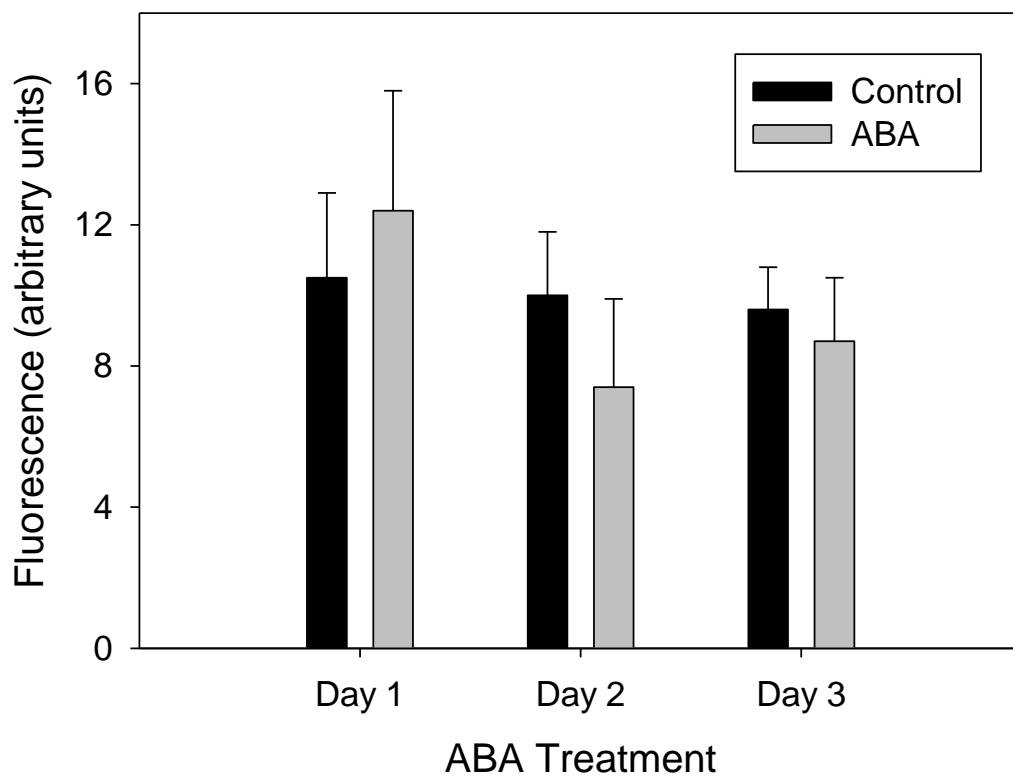

**Supplementary Figure 3.** Effect of ABA treatment on fluorescence of guard cells expressing GFP driven by the *HvALMT1* promoter.

Seedlings were sprayed with a solution that contained 1mM ABA (ABA) or with the same solution that lacked ABA (Control) and analysed for GFP fluorescence in guard cells over 3 days. Data are expressed as arbitrary units and represent the mean and standard error of four or five leaves. For each leaf five guard cells were analysed and the mean of these were used to calculate a grand mean.

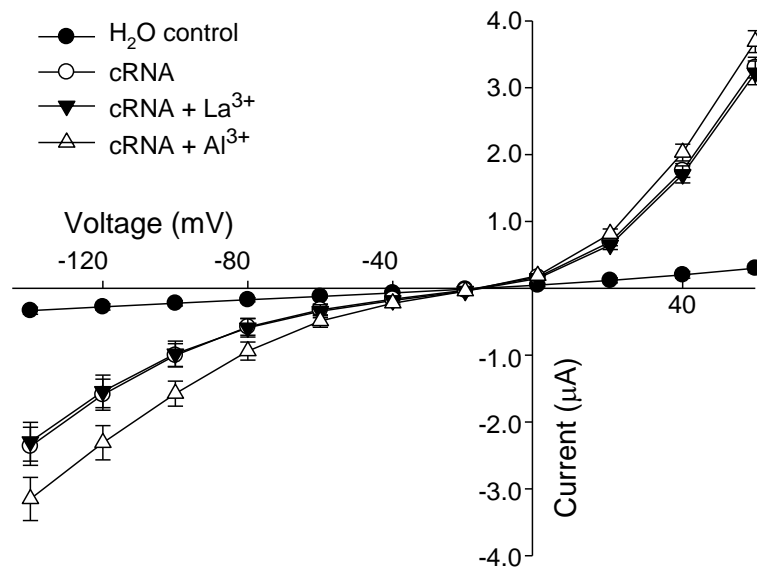

**Supplementary Figure 4.** Effect of  $\text{Al}^{3+}$  on currents in *Xenopus* oocytes expressing *HvALMT1*.

*Xenopus laevis* oocytes were injected with either water as a control ( $\text{H}_2\text{O}$  control) or with *HvALMT1* cRNA (cRNA). After 2 d oocytes were subsequently injected with malate and currents recorded from oocytes incubated in a buffer at pH 4.5 with no added trivalent cations (cRNA), in the presence of  $100 \mu\text{M}$   $\text{LaCl}_3$  (cRNA +  $\text{La}^{3+}$ ) or in the presence of  $100 \mu\text{M}$   $\text{AlCl}_3$  (cRNA +  $\text{Al}^{3+}$ ).  $\text{H}_2\text{O}$  controls treated with  $100 \mu\text{M}$  of either  $\text{LaCl}_3$  or  $\text{AlCl}_3$  generated similar curves to the  $\text{H}_2\text{O}$  control shown above and are not included in the figure. Error bars show SEM,  $n = 7$  (cRNA) and  $n = 5$  ( $\text{H}_2\text{O}$  control).

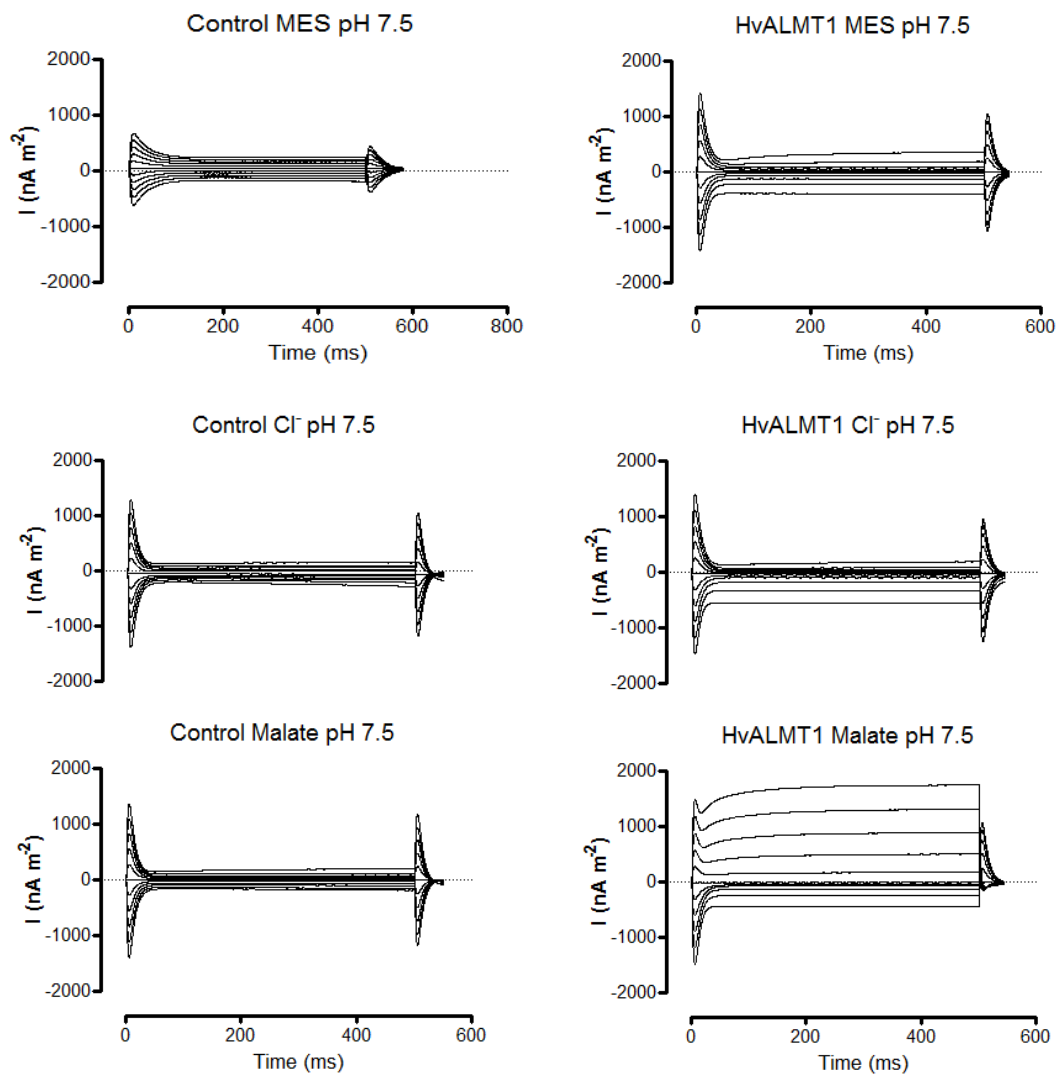

**Supplementary Figure 5** *HvALMT1*-dependent currents measured in oocytes at pH 7.5.

Family of current curves measured in *Xenopus laevis* oocytes injected with water (Control) or *HvALMT1* cRNA in response to 500 ms voltage pulses between -140 mV to 60 mV in 20 mV steps. The data were collected with either 10 mM MES-BTP, 10 mM Cl<sup>-</sup>-BTP or 10 mM malate-BTP in the bathing solution (pH 7.5



1 80

AtALMT1 (1) -----MEK**VREI**V**REGIR**V

BnALMT1 (1) -----ME**KLREI**V**REGRR**V

BnALMT2 (1) -----ME**KLREI**V**REGRR**V

TaALMT1 (1) -----MDIDHGR-----ESDGEMVG-----TIASCGLL**LH**SLLAGLGR**RAAGFAR**KVGG**A**

AtALMT9 (1) MAAKQGSFRHGILEKRERLLSNNGFSDFRFTDIESNDLLENENCGRRRTRLCSCCGN**LSEKIS**GVY**DDAKD**VARK**AWEM**

HvALMT1 (1) -----MEVDHRIR-VSDGDGETTAGQGGV**VAGVS**FAGCWQR**LRSVLVGLWCW**VAV**FAR**KVGR**I**

ZmALMT1 (1) -----MEIDEMESGVVNGSGGGGGG**S**-----FRRARCWEL**LCSAAG**-----**KVVGFAR**KLGR**I**

81 160

AtALMT1 (15) **GNE**D**PRRI**I**HAF**K**VGL**L**ALV**L**VS**S**FYYY**Q**PF**G**PFT**D**Y**F**G**I**N**A**MW**A**VM**T**VVV**V**FE**F**SV**G**AT**L**G**K**GL**N**R**G**VAT**L**VAG**G**L**G**I**G**A**

BnALMT1 (15) **GEE**D**PRRI**V**H**S**F**K**VGV**A**L**V**LVS**S**FYYY**Q**PF**G**PFT**D**Y**F**G**I**N**A**MW**A**VM**T**VVV**V**FE**F**SV**G**AT**L**SK**GLN**R**G**VAT**L**VAG**G**L**A**L**G**A**

BnALMT2 (15) **GEE**D**PRRI**V**H**S**F**K**VGV**A**L**V**LVS**S**FYYY**Q**PF**G**PFT**D**Y**F**G**I**N**A**MW**A**VM**T**VVV**V**FE**F**SV**G**AT**L**SK**GLN**R**G**VAT**L**VAG**G**L**A**L**G**A**

TaALMT1 (46) **ARE**D**PRR**V**AH**S**L**K**VGL**L**ALV**S**VV**F**V**F**T**---P**L**F**N**G**L**G**V**S**A**I**W**A**V**L**T**V**V**V**V**M**E**Y**T**V**G**A**T**L**SK**GLN**R**A**L**A**T**L**VAG**C**T**A**V**G**A**

AtALMT9 (81) **GVS**D**PRK**I**V**F**SA**K**I**G**L**A**L**T**I**V**A**L**L**I**F**Y**Q**---E**P**N**P**D**L**S**R**Y**SV**W**A**I**L**T**V**V**V**V**ME**Y**T**V**G**G**T**L**SK**GLN**R**A**F**A**T**L**VAG**F**T**A**V**G**A**

HvALMT1 (58) **ARE**D**PRR**V**AH**S**L**K**VGL**L**ALV**S**V**L**Y**Y**V**T---P**L**F**K**G**F**G**V**S**T**M**W**A**V**L**T**V**V**V**V**M**E**Y**T**V**G**G**T**L**SK**GLN**R**A**F**A**T**L**VAG**F**T**A**V**G**A**

ZmALMT1 (49) **ARD**D**PRR**V**AH**S**I**K**VGL**L**ALV**S**V**L**Y**Y**V**R---P**L**F**N**N**W**G**V**S**T**M**W**A**V**L**T**V**V**V**V**M**E**Y**T**V**G**G**T**L**SK**GLN**R**A**C**G**T**L**AAG**F**T**A**V**G**A**

161 240

AtALMT1 (95) **HQLAR**---L**S**G**A**T**V**E**P**I**L**L**V**M**L**V**F**V**Q**A**A**L**S**T**F**V**R**F**F**P**W**K**T**K**F**D**Y**G**I**L**I**F**I**L**T**F**A**L**I**S**L**S**G**F**R**D**E**E**I**M**D**L**A**E**S**R**L**S**T**V**I**

BnALMT1 (95) **HQLAS**---L**S**G**R**T**I**E**P**I**L**L**A**T**F**V**F**V**T**A**A**L**A**T**F**V**R**F**F**P**R**V**K**A**T**F**D**Y**G**M**L**I**F**I**L**T**F**S**L**I**S**L**S**Q**F**R**D**E**E**I**L**D**L**A**E**S**R**L**S**T**V**L**V**

BnALMT2 (95) **HQLAS**---L**S**G**R**T**I**E**P**I**L**L**A**T**F**V**F**V**T**A**V**L**A**T**F**V**R**F**F**P**R**V**K**A**T**F**D**Y**G**M**L**I**F**I**L**T**F**S**L**I**S**L**S**Q**F**R**D**E**E**I**L**D**L**A**E**S**R**L**S**T**V**L**V**

TaALMT1 (123) **HQLA**E**L**A**E**R**C**G**D**Q**G**E**P**I**M**L**T**V**L**V**F**V**A**S**A**A**T**F**L**R**F**I**P**E**I**K**A**K**Y**D**Y**G**V**T**I**F**I**L**T**F**L**V**A**V**S**S**Y**R**V**E**E**L**I**Q**L**A**H**Q**R**F**Y**T**I**A**V**

AtALMT9 (158) **AEL**S**T**---L**F**G**D**W**E**E**I**F**C**T**L**S**I**F**C**I**G**F**L**A**T**F**M**K**L**Y**P**S**M**K**A**-**Y**E**Y**G**F**R**V**F**L**L**T**Y**C**I**L**I**S**G**F**R**T**G**Q**F**I**E**V**A**I**S**R**F**L**L**I**A**L**

HvALMT1 (135) **HQVAN**---R**C**G**A**Q**G**E**P**I**L**L**A**I**F**V**F**L**A**S**A**A**T**F**S**R**F**I**P**E**I**K**A**R**Y**D**Y**G**V**T**I**F**I**L**T**F**S**L**V**A**V**S**S**Y**R**V**E**E**L**I**Q**L**A**H**Q**R**F**S**T**I**V**I

ZmALMT1 (126) **HKVAY**---L**C**G**D**K**A**E**P**V**L**L**A**V**F**V**F**L**L**S**S**A**A**T**F**S**R**F**I**P**E**V**K**A**R**Y**D**Y**G**V**T**I**F**I**L**T**F**S**L**V**A**V**S**S**Y**R**V**D**E**L**I**R**L**A**H**Q**R**F**S**T**I**V**V**

241 320

AtALMT1 (172) **GGV**S**C**I**L**I**S**I**F**V**C**P**V**W**A**G**Q**D**L**H**S**L**L**A**S**N**F**D**T**L**S**H**F**L**Q**D**F**G**D**E**Y**F**E**A**R**E**K**G-----D**Y**K**V**V**E**K**R**K**N**L**E**R**Y**K**S**V**L**D**S**K**S**D**E**

BnALMT1 (172) **GGV**S**C**I**L**I**S**I**F**V**C**P**V**W**A**G**Q**D**L**H**S**L**L**V**S**N**L**D**T**L**S**H**F**L**Q**E**F**G**D**E**Y**F**E**A**R**T**Y**G-----N**I**K**V**V**E**K**R**R**R**N**L**E**R**Y**K**S**V**L**N**S**K**S**D**E

BnALMT2 (172) **GGV**S**C**I**L**I**S**I**F**V**C**P**V**W**A**G**Q**D**L**H**S**L**L**I**S**N**L**D**T**L**S**H**F**L**Q**E**F**G**G**E**Y**F**E**A**R**E**Y**G-----D**I**K**V**V**E**K**R**R**R**N**L**E**R**Y**K**S**V**L**N**S**K**S**D**E

TaALMT1 (203) **G**V**F**I**C**L**T**T**V**F**L**F**P**V**W**A**G**E**D**V**H**K**L**A**S**G**N**L**D**K**L**A**Q**F**I**E**G**M**E**F**N**C**F**G**E**N**S**-----V**A**N**N**F**G**G**K**D**F**P**Q**M**H**K**S**V**L**N**S**K**A**T**E**

AtALMT9 (233) **G**A**G**V**S**L**G**V**N**M**F**I**Y**P**I**W**A**G**E**D**L**H**N**L**V**V**K**N**F**M**N**V**A**T**S**L**E**G**C**V**N**G**Y**L**R**C**L**E**Y**E**R**I**P**S**K**I**L**T**Y**Q**A**S**E**D**P**V**Y**K**G**Y**R**S**A**V**E**S**T**S**Q**E

HvALMT1 (212) **G**V**L**T**C**L**T**T**I**F**V**F**P**V**W**A**G**E**D**L**H**K**L**T**A**A**N**L**D**K**L**A**Q**F**L**Q**L**E**S**E**C**F**G**E**K**A-----A**S**E**N**L**E**D**K**A**F**L**Q**V**Y**K**S**V**L**N**S**K**A**S**E**

ZmALMT1 (203) **G**V**G**T**C**L**T**T**V**F**V**F**P**V**W**A**G**E**D**L**H**R**L**A**I**G**N**L**N**K**L**A**E**F**F**E**G**L**E**S**E**C**F**R**E**N**A**-----T**F**E**N**L**E**A**K**P**F**L**Q**V**Y**K**S**V**L**N**S**K**A**T**E**

321 400

AtALMT1 (247) EALANYAEWEPHGHQFR-FRHPWKQYVAVGALLRQCA YRIDALNSYINSDFI PVDIKK-----KLETPLRRMSSESGN

BnALMT1 (247) DSLANFAKWEPHGHGKFG-FRHPWKQYLVVAALVRQCAHRIDALNSYINSNFI PIDIKK-----KLEEPFRRMSLESQK

BnALMT2 (247) DTLANFAKWEPHGHGKFG-FRHPWKQYLVVAALVRQCAHRIDALNSYINSDFI PIDIKK-----KLEEPFRRMSLESQK

TaALMT1 (275) DSLCTFAKWEPHGHQFR-FRHPWSQYQKLGTLRQCAS SMEALASYVITTSKTQCPAAANPELSC KVRKTCGEMSLHSSK

AtALMT9 (313) ESLMSFAIWEPPHGPYKSFNYPWKNYVKLSGALKHCAF TVMALHGCLISEI QAPEERQ-----VFRQELQRVGVEGAK

HvALMT1 (284) DSLSNFAKWEPHGHGKFG-FRHPWSQYQKLGALCRQCAS SMEALASYVITLQKSQYPEAN-PELTF KVRMACGEMSHSAK

ZmALMT1 (275) DSLCNFAKWEPCHGKFK-FRHPWSQYQKLGALSQCAS SMEALASYVITLTRTEYPEAR-PELRSEVR TACRQMSLHSAK

401 \* \* \* \* 480

AtALMT1 (320) SMKEMSTSLKQMIKS-SSSDIHVSNSQAACKSLSTLLKS-GILNDVEPLQMSLMTTVS-----MLIDIV

BnALMT1 (320) AMKEASTSLKMMTKS-SSYDIHIINSQSACKALSTLLKS-GILNDVEPLQMVSLTTVS-----LLNDIV

BnALMT2 (320) ALKEASTSLKMMTKS-SSYDIHIINSQSASKALSTLLKSSGILNDVEPLQMVSLTTVS-----LLNDIV

TaALMT1 (354) VLRDLAMATRTMTVP-SPVNIITMATAVKAAESLRSELA-----ENTALLOVMHVAVTAT-----LLADLV

AtALMT9 (387) LLRELGEKVKKMEKLGPDVLLFEVHLAAEELQHKIDKKS-YLLVNSECWETGNRATKES EPQELLSLESDPPEHAPPI

HvALMT1 (362) ALKDLSTAIRTMIVP-SPANITMSSAIKVAKDLRNELS-----EDAAVLOVMHVAVTAT-----LISDLV

ZmALMT1 (353) ALRELSAAMRTMAVPPSPANAHMSAAAKAAKDLRVEL-----EDADLAQAMHVAVVAS-----LLSDLV

481 \* \* \* \* 560

AtALMT1 (383) NLTEKISESVHELASAAAFKNKMR---PTVLYEKSDSGSIGRAMPIDSHEDHHVTVLHDVDNDRSNNVDDSRGGSSQDS

BnALMT1 (383) NITEKISESVRELASAAAFRNKMKPTEPSVSLKCLDSGDTGCAMPINSRQGDHVTILLSDDDKDDIDDDDTSN-----

BnALMT2 (384) HITEKISESVRELASAAAFKNKMKPTEPTVSLKCLDSGDTGCAMPINSRQGDHVTILLSDDDDDT-----SN-

TaALMT1 (413) DRVKEIAECVDV LARLAHFKNPED-----TKNVVSVTVSRGIDEPLPDVVI L-----

AtALMT9 (466) YAFKSLSEAVLEIIPPSWGEKNHREALNHRPTFSKQVSWPARLVLPHPHLETNGASPLVETTKTYESASALSLATFASLLI

HvALMT1 (421) TTIVKIAETADNLARLGHFKNPEK-----TQKDVAINIAS-----

ZmALMT1 (412) TKAKQITESVGLTARLARFVKNNND-----HENADDKDTAAIDAVS-----

561 613

AtALMT1 (460) CHHVAIKIVDDNSNHEKHEDGIEHVHTLSNGHLQ-----

BnALMT1 (457) -----IVLDDDTINEKSEEDGEIHVQTSVREVGMMPPEHSLGVRILQI-----

BnALMT2 (452) -----NVVDDDTINEKPEDGIEHVDTSCVHGVGMMLHSLGVRILQI-----

TaALMT1 (460) -----

AtALMT9 (546) EFVARLQNVVDAFKELSQKANFKEPEIVTTGTDVEFSGERVGLGQKIRRCFGM

HvALMT1 (456) -----

ZmALMT1 (452) -----

**Supplementary Figure 6.** Alignments of functionally characterised ALMT proteins.

All seven proteins have been expressed and characterised for transport activity in *Xenopus* oocytes. The top four proteins in the alignment (AtALMT1, BnALMT1, BnALMT2 and TaALMT1) are all activated by Al<sup>3+</sup> (Ligaba *et al.*, 2006, Sasaki *et al.*, 2004, Hoekenga *et al.*, 2006) whereas the bottom three proteins (AtALMT9, HvALMT1 and ZmALMT1) show little or no response to Al<sup>3+</sup> treatment (Kovermann *et al.*, 2007, Pinos *et al.* 2008b, Supplementary Figure S3). However, for AtALMT9, Al<sup>3+</sup> was added to a solution of pH 7.5 which would effectively result in little or no Al<sup>3+</sup> in solution (Kovermann *et al.*, 2007) and was included since its membrane location (tonoplast) would suggest that the protein is not likely to be Al<sup>3+</sup> activated. The sequences were aligned using the Clustal W algorithm in the VectorNTI software package (version 11). Identical amino acid residues shared by all proteins have a yellow background, identical residues shared by four or more sequences have a blue background and strongly similar residues shared by four or more sequences have a green background. The asterisks and red letters denote strongly similar amino acid residues present in all four Al<sup>3+</sup> activated proteins and absent from the other proteins. Accession numbers (in bold) for the various proteins are AtALMT1: **AAF22890**; AtALMT9: **NP\_188473**; BnALMT1: **BAE97280**; BnALMT2: **BAE97281**; ZmALMT1: **ABC86748**; TaALMT1: **BAD10882** and HvALMT1: **EF424084**.

**GFP Movies 1 and 2. Time-series videos of fluorescence from the HvALMT1:GFP fusion.**

Shown are two time-series videos of fluorescence from cells that are transiently expressing the HvALMT1:GFP reporter fusion. Movie 1 shows a cell where the nucleus is prominent and movie 2 a cell where a GFP signal is also present at the plasma membrane. Images were acquired approximately every 5.8 seconds.
